# Supplementary material for: Prospective Engineering Applications of Dynamic Transfer Processes Possessing the Self-Organized Fractal Interfaces
Source: Hindawi journal article supplement (doi:10.1155/2013/310748), 2013-01-01
Supplement: f3 [file 310748.f3.zip]

Archive with 2 entries (2 files):
- Infra_Sound_Device.jpg
- Volumes_with_Voltmeter_and_Purged_Impurities.jpg
